# Supplementary material for: Concerted and Independent Evolution of Control Regions 1 and 2 of Water Monitor Lizards (Varanus salvator macromaculatus) and Different Phylogenetic Informative Markers
Source: MDPI journal article supplement (doi:10.3390/ani12020148), 2022-01-08
Supplement: s1 [file s1]

**Table S1** Summary of water monitor lizard (*Varanus salvator macromaculatus*) specimens. (Wongtienchai et al. 2021)

| Locality                       | Geographic coordinates     | Number of water monitor lizard samples | Code          | CR1 GenBank accession number | CR2 GenBank accession number |
|--------------------------------|----------------------------|----------------------------------------|---------------|------------------------------|------------------------------|
| Bang Kachao Peninsula          | 13°41'38"N,<br>100°33'39"E | 47                                     | VSMB01-VSMB47 | LC326253 – LC326299          | LC326325– LC326371           |
| Varanus Farm<br>Kamphaeng Saen | 13°59'2"N,<br>99°59'38"E   | 25                                     | VSMK01-VSMK25 | LC326300 – LC326324          | LC326372 – LC326396          |

Wongtienchai, P.; Lapbenjakul, S.; Jangtarwan, K.; Areesirisuk, P.; Mahaprom, R.; Subpayakom, N.; Singchat, S.; Sillapaprayoon, S.; Muangmai, N.; Songchan, R.; et al. Genetic management of a water monitor lizard (*Varanus salvator macromaculatus*) population at Bang Kachao Peninsula as a consequence of urbanization with Varanus Farm Kamphaeng Saen as the first captive research establishment. *J. Zoolog. Syst. Evol. Res.* **2021**, *59*, 484–497.
